# Supplementary material for: A prospective observational study of pancreatic cancer risk in men and women with pathogenic variants in BRCA1 or BRCA2
Source: Research Square preprint supplement (doi:10.21203/rs.3.rs-7131529/v1), 2025-09-02
Supplement: Supplementary file 1 [file 3a274f0158f7be8446fec2ea.docx]

**Supplementary table 1. Standardized incidence ratios in female *BRCA2* and male *BRCA1* carriers with and without a family history of pancreatic cancer**

|  |  | **Expected** | **Observed** | **SIR (95% confidence interval)** |
| --- | --- | --- | --- | --- |
| ***BRCA1*** | **Female carriers** | 2.6 | 3 | 1.2 (CI 0.2–3.4) |
| **Male carriers** | 1.6 | 9 | 5.5 (CI 2.5–10.5) |
| ***BRCA2*** | **Female carriers** | 1.2 | 8 | 6.5 (CI 2.8–12.9) |
| **Male carriers** | 0.45 | 1 | 2.2 (CI 0.1–12.3) |
| ***BRCA2* female carriers** | **No relatives with PC** | 0.91 | 6 | 6.6 (CI 2.4–14.4) |
| **≥ 1 relative with PC** | 0.32 | 2 | 6.3 (CI 0.8–22.7) |
| **No known mut+ relative with PC** | 1.0 | 6 | 5.8 (CI 2.1–12.5) |
| **≥ 1 mut+ relative with PC** | 0.18 | 2 | 10.9 (CI 1.3–39.2) |
| ***BRCA1* male carriers** | **No relatives with PC** | 1.37 | 6 | 4.4 (CI 1.6–9.6) |
| **≥ 1 relative with PC** | 0.27 | 3 | 11.3 (CI 2.3–32.9) |
| **No known mut+ relative with PC** | 1.45 | 8 | 5.5 (2.4–10.9) |
| **≥ 1 mut+ relative with PC** | 0.19 | 1 | 5.4 0.1–30.1) |
